# Supplementary material
Source: MDPI journal article supplement (https://www.mdpi.com/1999-4907/8/8/272)
Supplement: s1 [file s1]

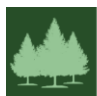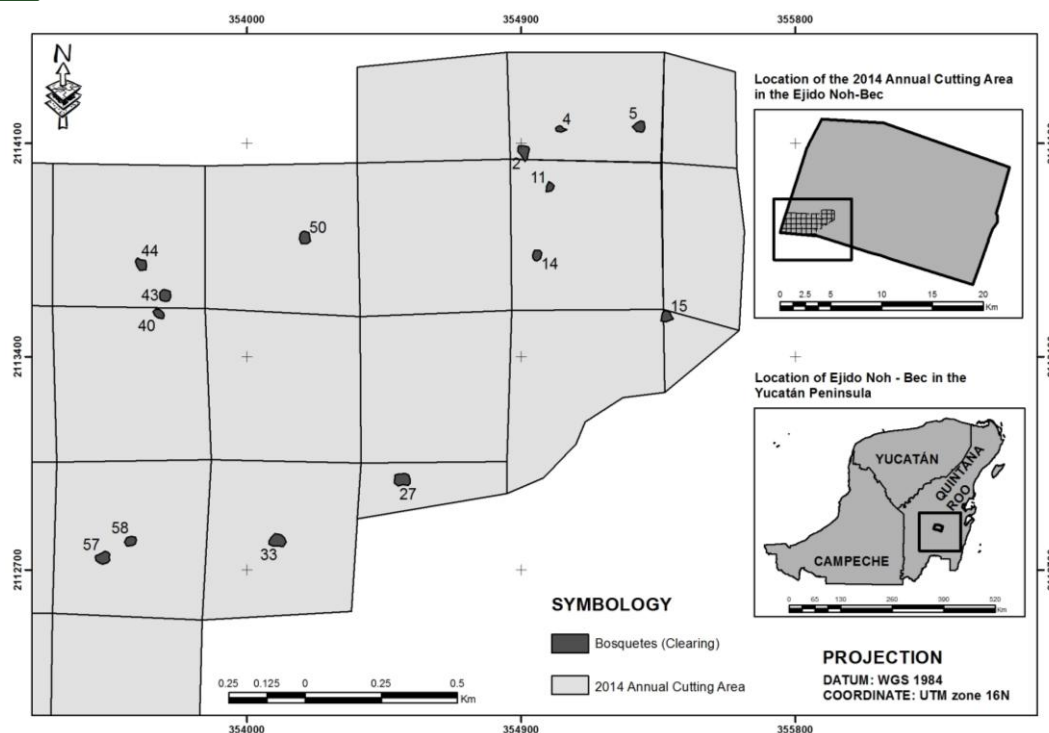

**Figure S1.** Study area in Ejido Noh Bec in the state of Quintana Roo on the Yucatan Peninsula in Mexico (numbers in main map indicated the 14 sampled bosquetes).

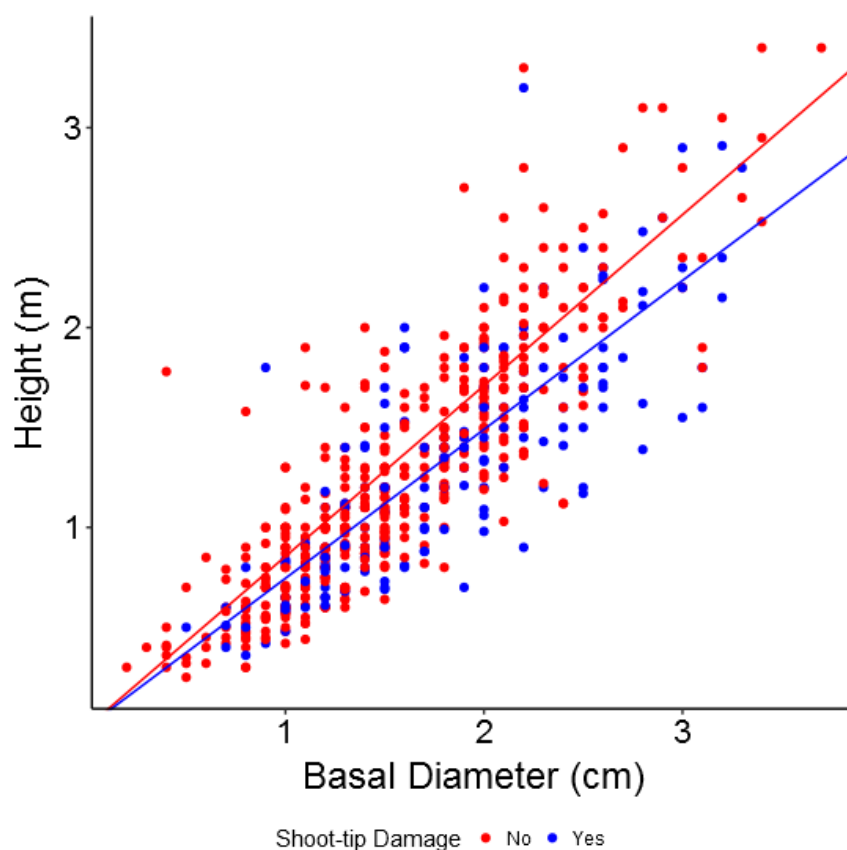

**Figure S2.** Total heights and stem diameters (at 10 cm above the ground) of planted mahogany seedlings in enrichment planted gaps (bosquetes) that suffered shoot tip damage (blue dots) or that showed no signs of shoot tip replacement (red dots).
